# Supplementary material
Source: PubMed Central journal article supplement (PMC5885166)
Supplement: jamaneurol-e180254-s001.pdf [file jamaneurol-e180254-s001.pdf]

## Supplementary Online Content

Dawson BK, Fereshtehnejad S-M, Anang JBM, et al. Office-based screening for dementia in Parkinson disease: the Montreal Parkinson Risk of Dementia Scale in 4 longitudinal cohorts. *JAMA Neurol*. Published online March 26, 2018.  
doi:10.1001/jamaneurol.2018.0254

**eTable 1.** MoPaRDS and Weighted MoPaRDS items and Scoring

**eTable 2.** Predictive Variables Assessed Across All Cohorts

**eTable 3.** Risk Stratification in MCI vs. Non-MCI Patients

**eTable 4.** Diagnostic Evaluation of MoPaRDS and Weighting With Cross-Validation, By Cutoff

**eTable 5.** Diagnostic Evaluation of MoPaRDS, By Sex

This supplementary material has been provided by the authors to give readers additional information about their work.

**eTable 1. MoPaRDS and Weighted MoPaRDS items and scoring**

| <b>Predictors</b>                 | <b>MoPaRDS</b> | <b>Weighted MoPaRDS</b> |
|-----------------------------------|----------------|-------------------------|
| Male sex                          | 1              | 1                       |
| Bilateral disease onset           | 1              | 2                       |
| Falls or freezing                 | 1              | 4                       |
| Age greater than 70 years         | 1              | 5                       |
| Orthostatic BP drop > 10 mmHg     | 1              | 5                       |
| REM Sleep Behavior Disorder (RBD) | 1              | 5                       |
| Positive MCI status               | 1              | 5                       |
| Hallucinations                    | 1              | 6                       |
| <b>Maximum score</b>              | <b>8</b>       | <b>33</b>               |

**eTable 2. Predictive variables assessed across all cohorts**

| <b>Predictors</b>         | <b>OR [95% CI]</b> | <b>p-value</b> |
|---------------------------|--------------------|----------------|
| Male Sex                  | 1.89 [1.08,3.32]   | 0.026          |
| Bilateral Disease Onset   | 4.06 [2.36,6.98]   | <0.001         |
| Falls or Freezing         | 5.37 [3.18,9.07]   | <0.001         |
| Age greater than 70 years | 6.51 [3.79,11.19]  | <0.001         |
| Orthostatic BP >10mmHg    | 6.28 [3.54,11.15]  | <0.001         |
| RBD                       | 9.32 [5.17,16.81]  | <0.001         |
| Positive MCI Status       | 7.57 [4.21,13.62]  | <0.001         |
| Hallucinations            | 6.84 [3.68,12.72]  | <0.001         |

**eTable 3. Risk stratification in MCI vs. non-MCI patients**

| Risk Group,<br>by MoPaRDS<br>Score | All Cohorts (Non-MCI<br>only), n=377                 |                  | All Cohorts (MCI only),<br>n=147                     |                  | All Cohorts, n=607                                   |                  |
|------------------------------------|------------------------------------------------------|------------------|------------------------------------------------------|------------------|------------------------------------------------------|------------------|
|                                    | With/Without<br>Dementia No.<br>(%) With<br>Dementia | Annual<br>Risk % | With/Without<br>Dementia No.<br>(%) With<br>Dementia | Annual<br>Risk % | With/Without<br>Dementia No.<br>(%) With<br>Dementia | Annual<br>Risk % |
| Low risk (0-3)                     | 9/345 (2.5%)                                         | 0.6%             | 2/79 (2.5%)                                          | 0.6%             | 12/453 (2.6%)                                        | 0.6%             |
| Intermediate<br>risk (4-5)         | 5/13 (22.2%)                                         | 5.0%             | 18/23 (44.0%)                                        | 10.0%            | 25/74 (27.1%)                                        | 5.8%             |
| High risk (6-8)                    | 2/1 (66.6%)                                          | 16.7%            | 20/5 (80%)                                           | 18.2%            | 28/15 (65.1%)                                        | 14.9%            |

**eTable 4. Diagnostic Evaluation of MoPaRDS and weighting with cross-validation, by cutoff**

|                 | MoPaRDS             |                     |                     | Weighted MoPaRDS    |                     |
|-----------------|---------------------|---------------------|---------------------|---------------------|---------------------|
|                 | All Cohorts         | Training Set        | Testing Set         | Training Set        | Testing Set         |
| ROC AUC         | 0.877 [0.829,0.924] | 0.875 [0.801,0.949] | 0.879 [0.816,0.942] | 0.889 [0.823,0.955] | 0.885 [0.826,0.943] |
| <b>Cutoff≥3</b> |                     |                     |                     | <b>Cutoff≥13</b>    |                     |
| Sensitivity, %  | 87.1 [77.0,94.0]    | 87.1 [70.2,96.4]    | 87.2 [72.6,95.7]    | 87.1 [70.2,96.4]    | 82.1 [66.5,92.5]    |
| Specificity, %  | 68.2 [64.1,72.1]    | 66.4 [60.4,72.1]    | 70.0 [64.2,75.3]    | 82.6 [77.5,87.0]    | 83.9 [79.0, 88.0]   |
| PPV, %          | 26.3 [23.4,29.4]    | 23.3 [19.6,27.4]    | 29.3 [25.0,34.0]    | 37.0 [30.4,44.1]    | 42.1 [34.8,49.7]    |
| NPV, %          | 97.6 [95.7,98.7]    | 97.8 [94.6,99.1]    | 97.4 [94.4,98.9]    | 98.2 [95.6,99.3]    | 97.0 [94.4,98.5]    |
| +LR             | 2.74 [2.35,3.20]    | 2.6 [2.09,3.22]     | 2.90 [2.34,3.61]    | 5.02 [3.73,6.74]    | 5.09 [3.74,6.93]    |
| -LR             | 0.19 [0.10,0.35]    | 0.19 [0.08,0.49]    | 0.18 [0.08,0.42]    | 0.16 [0.06,0.39]    | 0.21 [0.11,0.42]    |
| <b>Cutoff≥4</b> |                     |                     |                     | <b>Cutoff≥14</b>    |                     |
| Sensitivity, %  | 77.1 [65.6,86.3]    | 83.9 [66.3,94.6]    | 71.8 [55.1,85.0]    | 83.9 [66.3,95.4]    | 79.5 [63.5,90.7]    |
| Specificity, %  | 87.2 [84.0,89.9]    | 86.4 [81.7,90.3]    | 87.9 [83.4,91.5]    | 85.7 [80.9,89.6]    | 86.1 [81.4,90.0]    |
| PPV, %          | 43.9 [37.8,50.2]    | 41.9 [33.9,50.4]    | 45.9 [36.9,55.3]    | 40.6 [32.9,48.8]    | 44.9 [36.8,53.3]    |
| NPV, %          | 96.7 [95.0,97.8]    | 97.9 [95.4,99.0]    | 95.6 [93.0,97.3]    | 97.8 [95.3,99.0]    | 96.7 [94.1,98.2]    |
| +LR             | 5.94 [4.08,8.65]    | 6.17 [4.39,8.68]    | 5.94 [4.08,8.65]    | 5.85 [4.20, 8.15]   | 5.71 [4.08,7.99]    |
| -LR             | 0.26 [0.17,0.40]    | 0.19 [0.08,0.42]    | 0.32 [0.19,0.53]    | 0.19 [0.08,0.42]    | 0.24 [0.13,0.44]    |

**eTable 5. Diagnostic Evaluation of MoPaRDS, by sex**

|                           | Male, n=376                |                   |                    | Female, n=231               |                  |                   |
|---------------------------|----------------------------|-------------------|--------------------|-----------------------------|------------------|-------------------|
| <b>AUC</b>                | <b>0.916 [0.873,0.960]</b> |                   |                    | <b>0.805 [0.707, 0.903]</b> |                  |                   |
| <b>Cutoff<sup>a</sup></b> | <b>≥2</b>                  | <b>≥3</b>         | <b>≥4</b>          | <b>≥2</b>                   | <b>≥3</b>        | <b>≥4</b>         |
| Sensitivity               | 96.1 [86.8,99.5]           | 90.4 [79.0,96.8]  | 71.2 [56.9,82.9]   | 83.3 [58.6,96.4]            | 61.1 [35.8,82.7] | 38.9 [17.3,64.3]  |
| Specificity               | 60.0 [53.4,64.3]           | 83.6 [79.2,87.5]  | 92.9 [89.5,95.5]   | 62.9 [56.1,69.4]            | 82.2 [76.4,87.1] | 92.5 [88.1,95.7]  |
| PPV                       | 27.3 [24.6,30.2]           | 47.0 [40.6,53.53] | 61.7 [51.1,71.21]  | 16.0 [12.7,19.93]           | 22.5 [15.4,31.6] | 30.4 [17.2,48.0]  |
| NPV                       | 99.0 [96.1,99.7]           | 98.2 [95.9,99.2]  | 95.3 [92.9,96.8]   | 97.8 [94.1,99.2]            | 96.2 [93.3,97.8] | 94.7 [92.5,96.3]  |
| LR+                       | 2.34 [2.02,2.70]           | 5.53 [4.25,7.18]  | 10.02 [6.52,15.41] | 2.25 [1.71,2.95]            | 3.43 [2.15,5.47] | 5.18 [2.45,10.92] |
| LR-                       | 0.07 [0.02,0.25]           | 0.11 [0.05,0.26]  | 0.31 [0.20,0.48]   | 0.26 [0.09,0.75]            | 0.47 [0.26,0.85] | 0.66 [0.46,0.96]  |

a. On a MoPaRDS scale of 7 – Male Sex excluded
